# Supplementary material
Source: publisher figshare collection journal article supplement (https://wiley.figshare.com/articles/dataset/_/3549960)
Supplement: Supplementary file 1 [file 1 › appendix-A.htm]

Ecological Archives E091-215-A1


### *Ecological Archives* E091-215-A1

### **Edward A. Codling, Rachel N. Bearon, and Graeme J. Thorn. 2010. Diffusion about the mean drift location in a biased random walk. *Ecology* 91:3106–3113.**

Appendix A. Simulating biased random walks.

> View/ download PDF.

---


[Back to E091-215]
