# Supplementary material
Source: publisher figshare collection journal article supplement (https://wiley.figshare.com/articles/dataset/_/3549960)
Supplement: Supplementary file 1 [file 1 › appendix-A.pdf]

**Edward A. Codling, Rachel N. Bearon, and Graeme J. Thorn. 2010. Diffusion about the mean drift location in a biased random walk. *Ecology* 91:3106–3113**

**Appendix A. Simulating biased random walks.**

To illustrate and validate the spatial distributions corresponding to the predicted expressions for the diffusion coefficients in Table 2 of the main paper, biased random walks are simulated as follows. Each random walker starts at the origin  $(x_0, y_0) = (0, 0)$ . At each time step,  $\tau$ , a direction of movement,  $\theta$ , is chosen from the relevant angular distribution (see below). The new position is given by  $(x_{n+1}, y_{n+1}) = (x_n, y_n) + \delta(\cos \theta, \sin \theta)$  (where  $\delta$  is a fixed constant in the basic ‘fixed-speed’ model, and an exponentially distributed random variable with mean  $\bar{\delta}$  and variance  $\sigma_{\delta}^2(\bar{\delta})^2$  in the ‘variable speed’ model). This random walk process continues for  $n$  steps and the final position is recorded. Finally, a number of random walks,  $m$ , of this type are simulated (typically at least  $m > 10,000$ ) and the average diffusion coefficients and the final spatial distribution are found. Simulations are completed in the R environment (R Development Core Team 2009).

The direction of movement at each step is drawn from a specified angular distribution. To simulate the von Mises, wrapped normal and wrapped Cauchy we respectively use the *rvm*, *rwrpnorm* and *rwrpcauchy* functions from the *CircStats* package in R (R Development Core Team 2009). To simulate the truncated normal distribution we set up

a simple algorithm based on a standard acceptance-rejection method (e.g., Press et al. 1992). This program code is available from the authors as an R function on request.

The estimates of the diffusion coefficients from the simulation results are calculated from

the observed mean squared displacement of  $m > 10,000$  walkers:  $\bar{D}_x = \frac{2}{mn} \sum_m (x - \bar{x})^2$

and  $\bar{D}_y = \frac{2}{mn} \sum_m (y - \bar{y})^2$ , after the long-time steady state is reached. This includes the

rescaling  $4\pi/(\bar{\delta})^2$  so that in the basic ‘fixed-speed’ model we typically have  $0 \leq D_x, D_y \leq$

1. The number of time steps required to reach ‘steady-state’ (so that the spatial distribution is Gaussian) is inversely proportional to  $\rho$ , so simulations were not all run for the same length of time or with the same number of walkers. Simulations for small  $\rho$  reach the steady state quickly so were run for a short number of time steps ( $n \geq 100$ ), but are very noisy so a larger number of walkers were used (up to  $m = 10^6$  for  $\rho \approx 0$ ).

Conversely, simulations with large  $\rho$  are not very noisy but require a long time to reach the steady state (see Figs. 2c and d in the main paper). As  $\rho \rightarrow 1$  we used a minimum of  $m = 10,000$  walkers but ran simulations for as many as  $n = 10^6$  time steps.

#### LITERATURE CITED

Press, W. H., B. P. Flannery, S. A. Teukolsky, and W. T. Vetterling. 1992. Numerical Recipes in C: The Art of Scientific Computing. Cambridge University Press, Cambridge, UK.

R Development Core Team. 2009. R: A Language and Environment for Statistical Computing. R Foundation for Statistical Computing, Vienna, Austria. ISBN 3-900051-07-0. <http://www.R-project.org>
